# Supplementary material
Source: publisher figshare collection journal article supplement (https://acs.figshare.com/ndownloader/files/3755803)
Supplement: Supplementary file 1 [file 3755803]

## Supporting Information

# High-Temperature Ferroelectricity and Photoluminescence in a Hybrid Organic-Inorganic Compound: (3-Pyrrolinium)MnCl<sub>3</sub>

Heng-Yun Ye <sup>†,‡</sup>, QiongHua Zhou, <sup>‡,§</sup>, XiangHong Niu<sup>‡</sup>, Wei-Qiang Liao<sup>†</sup>, Da-Wei Fu<sup>†</sup>, Yi Zhang<sup>†</sup>, Yu-Meng You<sup>†,\*</sup>, Jinlan Wang<sup>‡,\*</sup>, Zhong-Ning Chen<sup>§</sup>, Ren-Gen Xiong<sup>†,\*</sup>

<sup>†</sup>Ordered Matter Science Research Center, Southeast University, Nanjing 211189, P. R. China.

<sup>‡</sup>Department of Physics, Southeast University, Nanjing 211189, P. R. China.

<sup>§</sup>Fujian Institute of Research on the Structure of Matter, The Chinese Academy of Sciences, Fuzhou 350002, P. R. China.

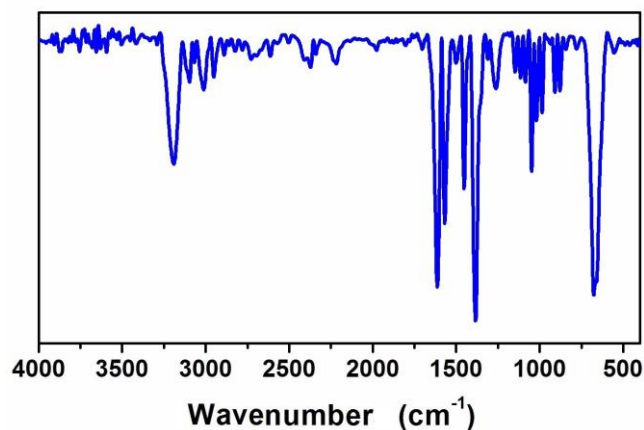

**Figure S1.** IR spectrum for (3-pyrrolinium)MnCl<sub>3</sub> (**1**).

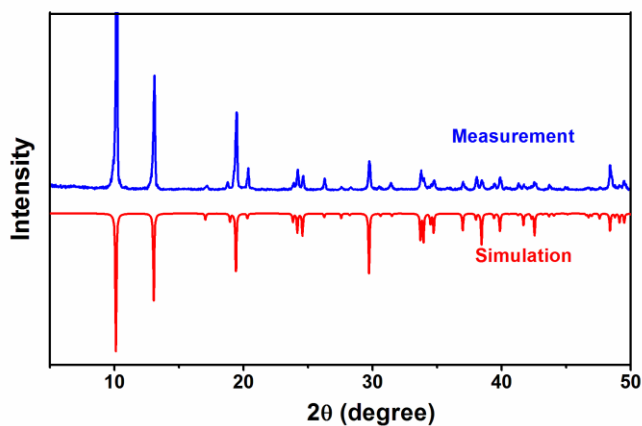

**Figure S2.** Pattern of the powder X-ray diffraction (PXRD) of (3-pyrrolinium)MnCl<sub>3</sub> (**1**), verifying the purity of the bulk phase.

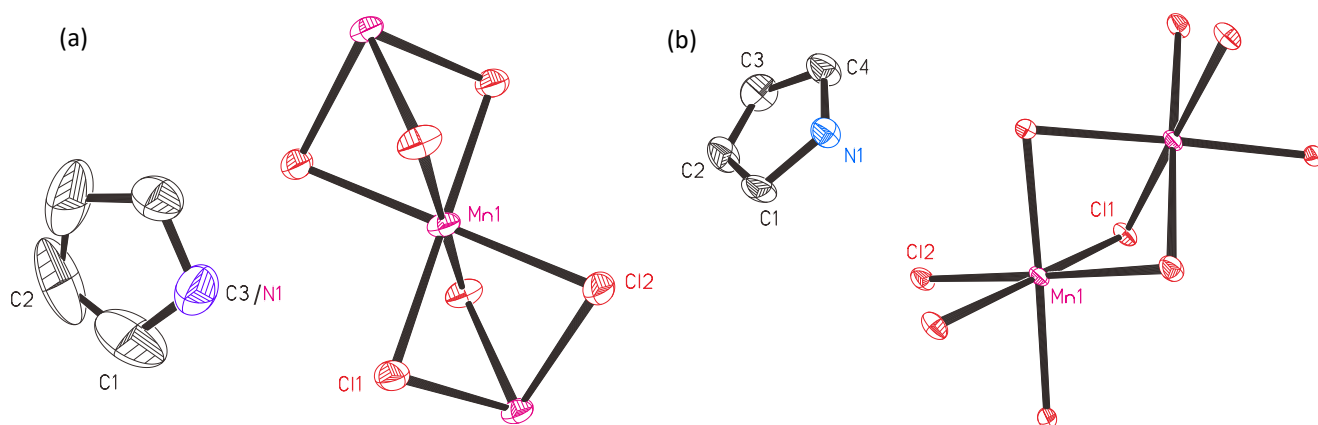

**Figure S3.** Ellipsoid drawings of symmetric units of (3-pyrrolinium) $\text{MnCl}_3$  (**1**) in (a) the HTP at 413 K and in (b) the LTP at 273 K. In (a), the site of N1/C3 is occupied equally by C and N atoms. Atoms not labeled are generated by symmetry operator. Displacement ellipsoids were drawn at 30% probability level.

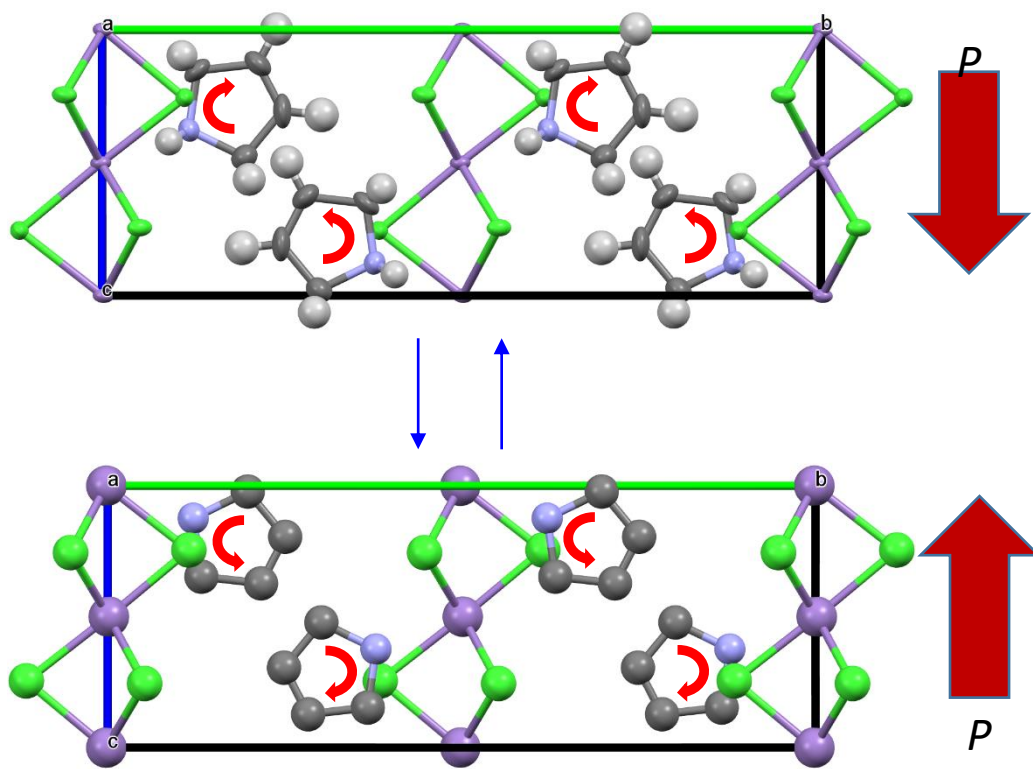

**Figure S4.** Schematic drawing of the realization of polarization reversal in (3-pyrrolinium) $\text{MnCl}_3$  (**1**).

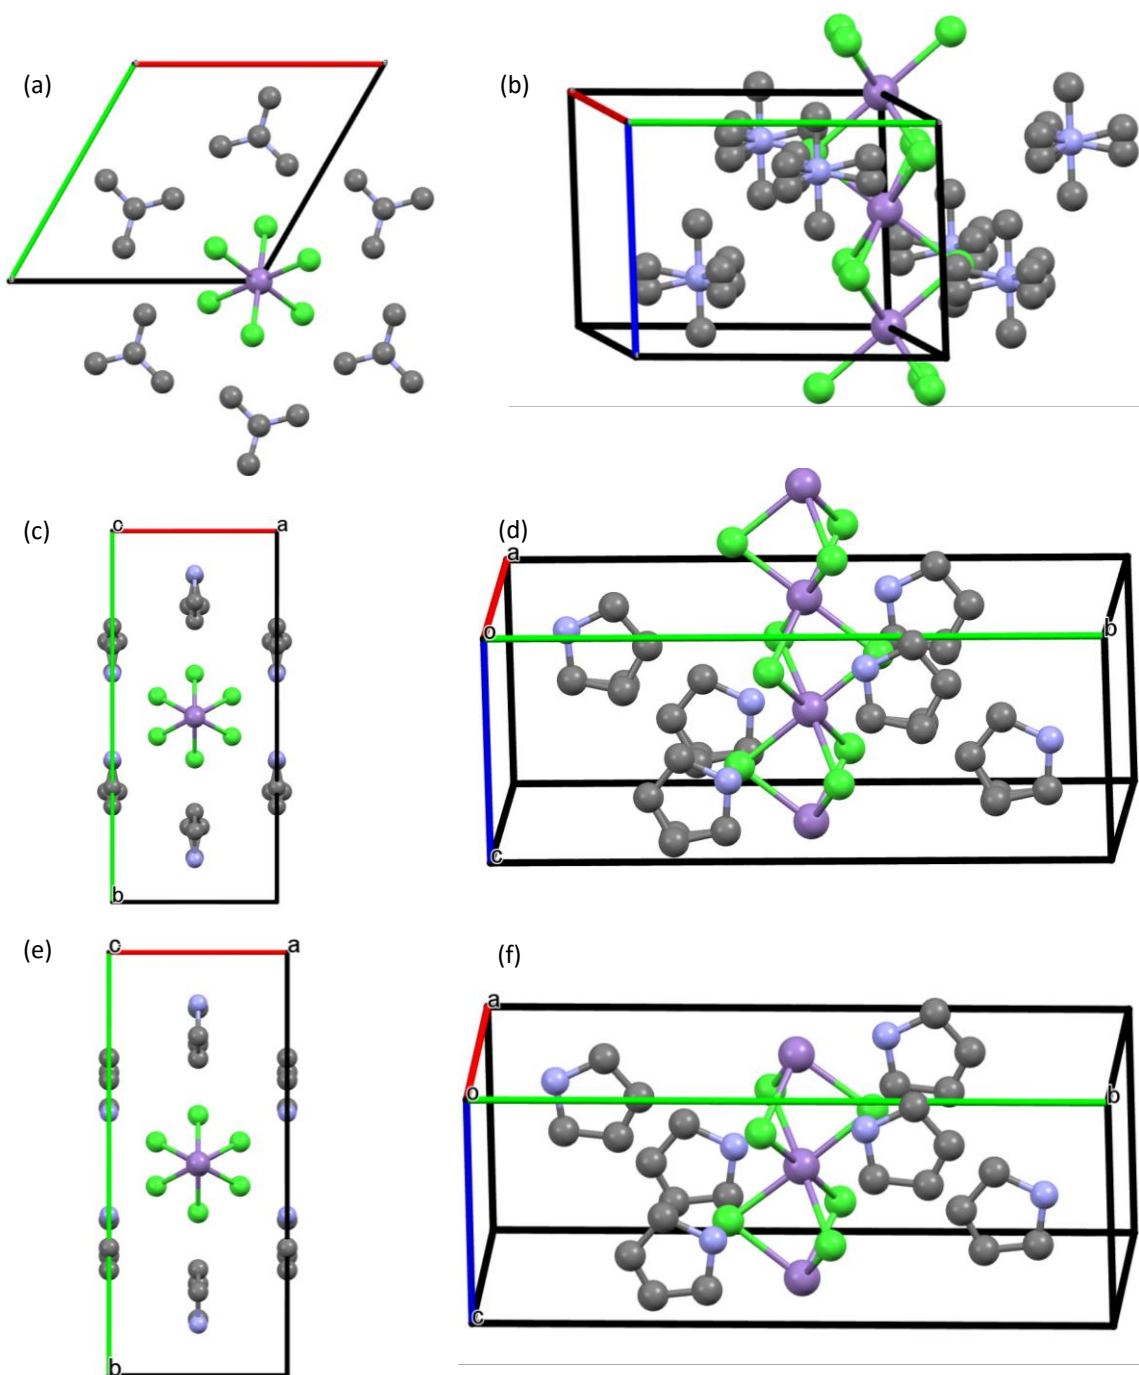

**Figure S5.** Comparison of crystal structures of (tetramethylammonium)MnCl<sub>3</sub> (a,b), (pyrrolidinium)MnCl<sub>3</sub> (c,d) and (3-pyrrolinium)MnCl<sub>3</sub> (1) (e, f). H atoms were omitted for clarity.

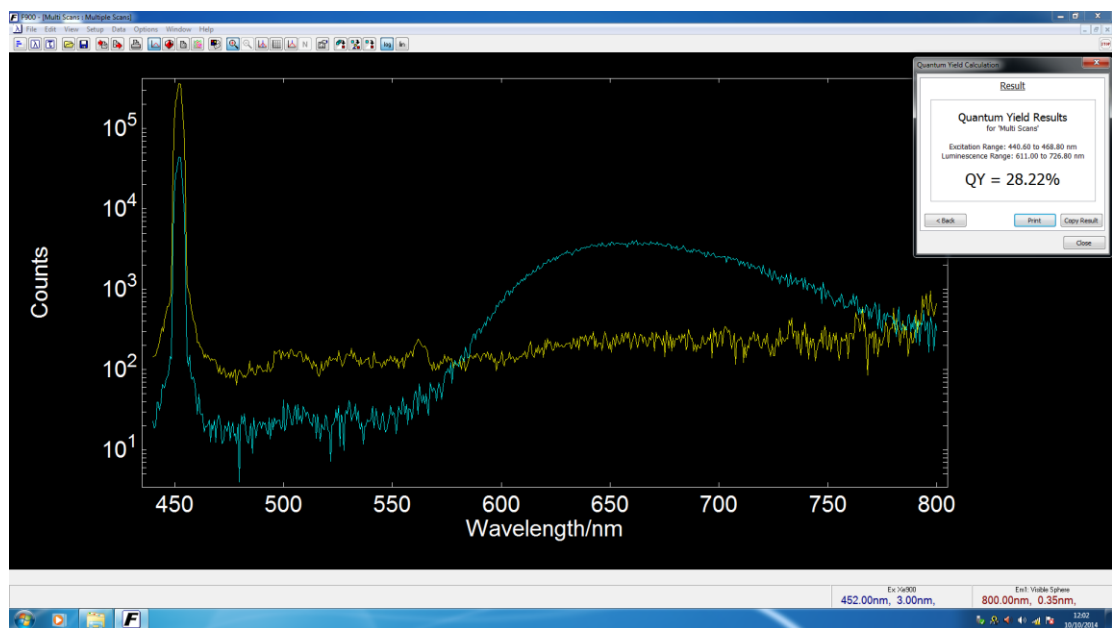

**Figure S6.** The quantum yield measurement of (3-pyrrolinium)MnCl<sub>3</sub> (**1**), giving a quantum yield of 28.22%.

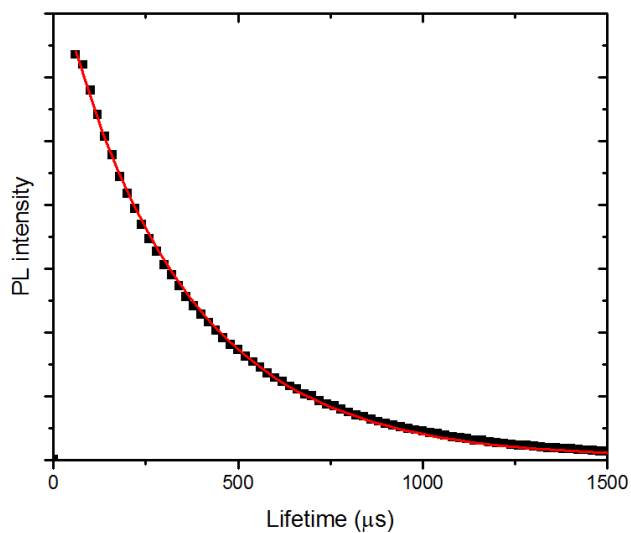

**Figure S7.** The lifetime measurement of (3-pyrrolinium)MnCl<sub>3</sub> (**1**). The fitted lifetime is 333.6 μs.

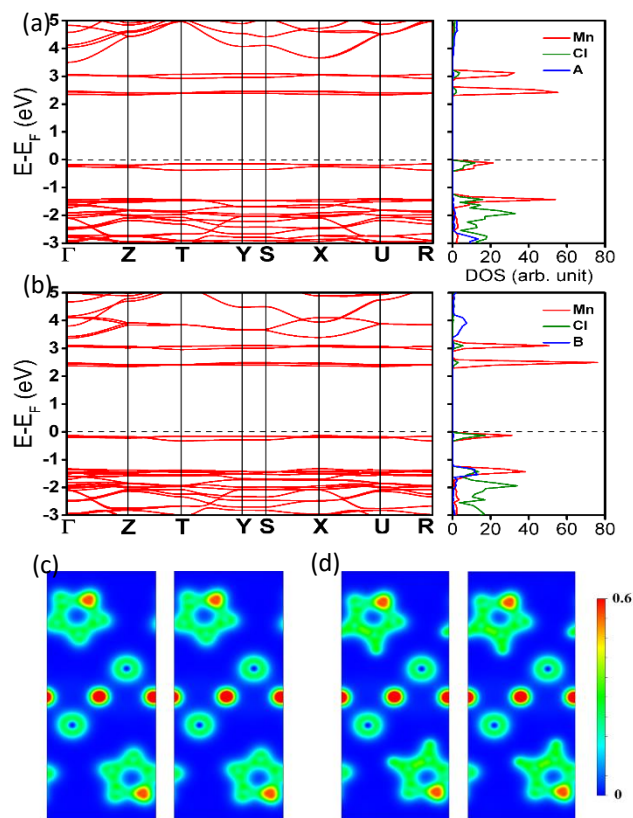

**Figure S8.** The band structure and corresponding density of states (DOS) of (a)  $\text{AMnCl}_3$  and (b)  $\text{BMnCl}_3$ . Highest occupied band and lowest unoccupied band of (c)  $\text{AMnCl}_3$  and (d)  $\text{BMnCl}_3$ . The unit of the scale is  $\text{e}/\text{bohr}^3$ . A = (pyrrolidinium), B = (3-pyrrolinium).

**Table S1.** Fitted Curie constants at different frequencies.

| Frequency | $C_{\text{para}}$ (K) | $C_{\text{ferro}}$ (K) | $C_{\text{para}}/C_{\text{ferro}}$ | $T_0$ (K) |
|-----------|-----------------------|------------------------|------------------------------------|-----------|
| 1 MHz     | 4086                  | 1614                   | 2.53                               | 374.2     |
| 100 kHz   | 4953                  | 2000                   | 2.48                               | 374.6     |
| 10 kHz    | 5906                  | 2418                   | 2.44                               | 375.3     |
| 5 kHz     | 6134                  | 2578                   | 2.38                               | 375.5     |
| 1 kHz     | 6706                  | 3163                   | 2.12                               | 376.1     |
| 500 Hz    | 7085                  | 3374                   | 2.10                               | 376.3     |

**Table S2.** Comparison between ground state of (pyrrolidinium)MnCl<sub>3</sub> and (3-pyrrolinium)MnCl<sub>3</sub>.

| Property                              | (pyrrolidinium)MnCl <sub>3</sub> | (3-pyrrolinium)MnCl <sub>3</sub> . |
|---------------------------------------|----------------------------------|------------------------------------|
| Cation                                | pyrrolidinium                    | 3-pyrrolinium                      |
| a / Å                                 | 7.65                             | 7.36                               |
| b / Å                                 | 17.25                            | 17.49                              |
| c / Å                                 | 6.48                             | 6.47                               |
| Magnetic order                        | AFM                              | AFM                                |
| Magnetic moment / $\mu_B$ per Mn atom | 4.4                              | 4.4                                |
| $P_s$ / $\mu C \cdot cm^{-2}$         | 8.04                             | 8.04                               |
| Charge transfer /electron per cation  | 0.81                             | 0.82                               |

\*The cell constants are fixed to experimental value during optimization.
